# Supplementary material for: The Cation Effect on the Free Volume and the Solubility of H2S and CO2 in Ionic Liquids Based on Bis(2-Ethylhexyl) Sulfosuccinate Anion
Source: MDPI journal article supplement (doi:10.3390/membranes13020238), 2023-02-16
Supplement: s1 [file s1]

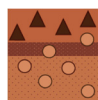

## Supplementary material

# The Cation Effect on the Free Volume and the Solubility of H<sub>2</sub>S and CO<sub>2</sub> in Ionic Liquids Based on Bis(2-Ethylhexyl) Sulfosuccinate Anion

Tatyana S. Sazanova <sup>1</sup>, Alsu I. Akhmetshina <sup>2,†</sup>, Anton N. Petukhov <sup>1,3,\*</sup>, Andrey V. Vorotyntsev <sup>3</sup>, Sergey S. Suvorov <sup>3</sup>, Alexandra V. Barysheva <sup>3</sup>, Amal Mechergui <sup>1</sup>, Alexander V. Nyuchev <sup>3</sup>, Olga V. Kazarina <sup>1,3</sup>, Anna N. Stepanova <sup>1</sup>, Maria E. Atlaskina <sup>1</sup>, Artem A. Atlaskin <sup>1</sup>, Sergey S. Kryuchkov <sup>1</sup> and Ilya V. Vorotyntsev <sup>1</sup>

<sup>1</sup> Laboratory of SMART Polymeric Materials and Technologies, Mendeleev University of Chemical Technology, 9 Miusskaya Sq., Moscow 125047, Russia

<sup>2</sup> Department of Technologies for the processing of polymers and composite materials, Kazan National Research Technological University, 68 Karl Marx Str., Kazan 420015, Russia

<sup>3</sup> Chemical Engineering Laboratory, Research Institute for Chemistry, N.I. Lobachevsky State University of Nizhny Novgorod, 23 Gagarin Avenue, Nizhny Novgorod 603950, Russia

\* Correspondence: antopetukhov@gmail.com

† Deceased author.

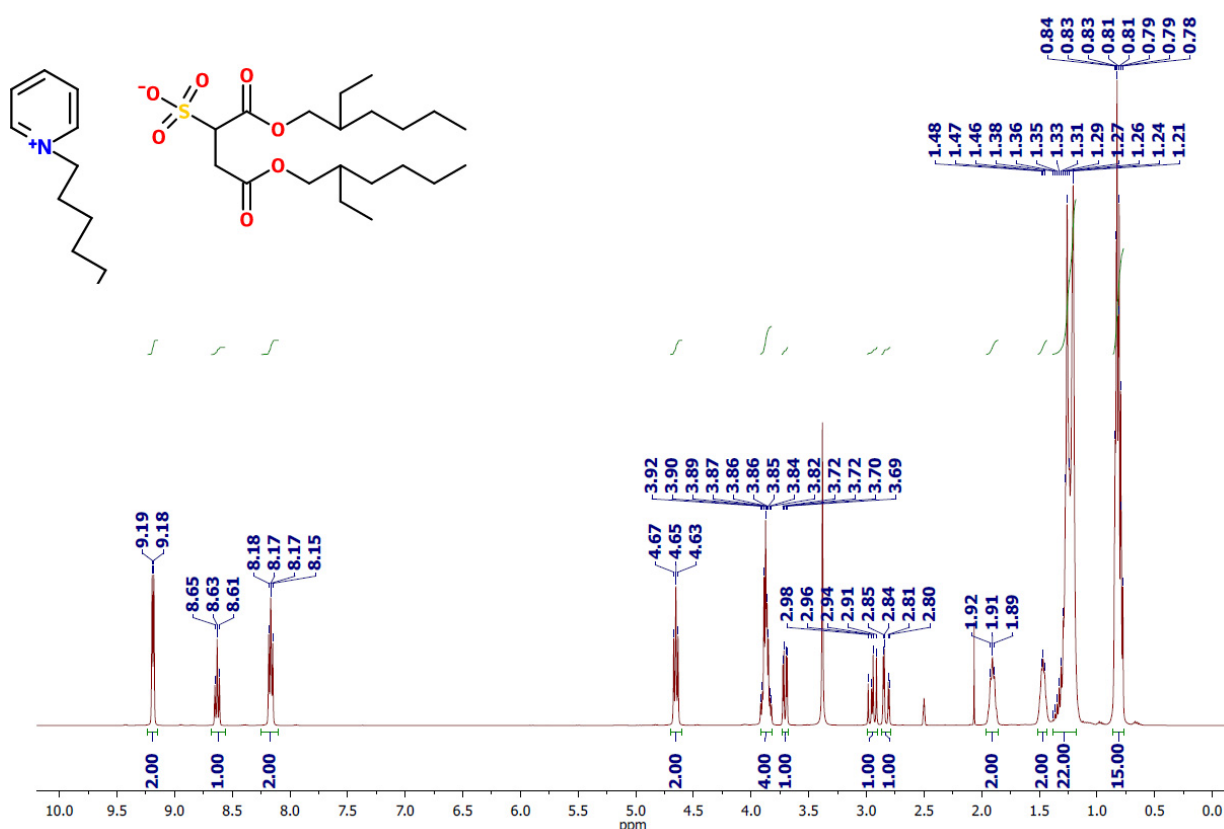

A

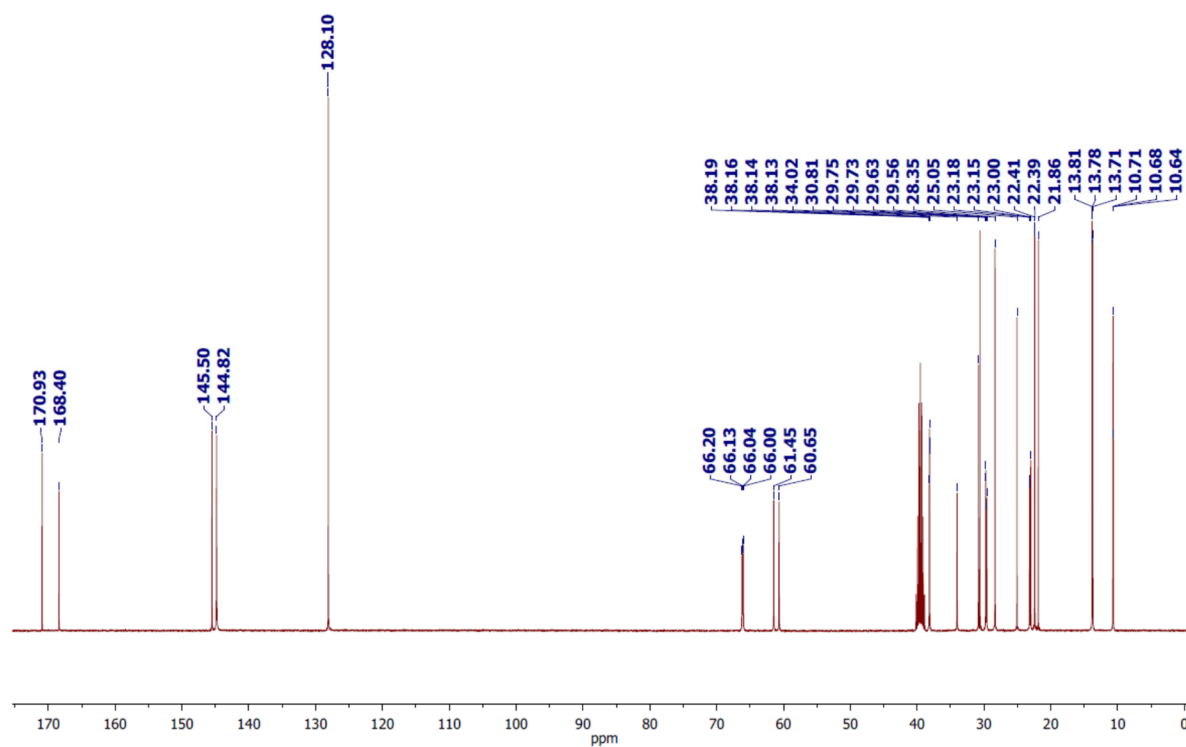

B

**Figure S1.** The <sup>1</sup>H (a) and <sup>13</sup>C NMR (b) of 1-hexylpyridinium bis(2-ethylhexyl) sulfosuccinate.

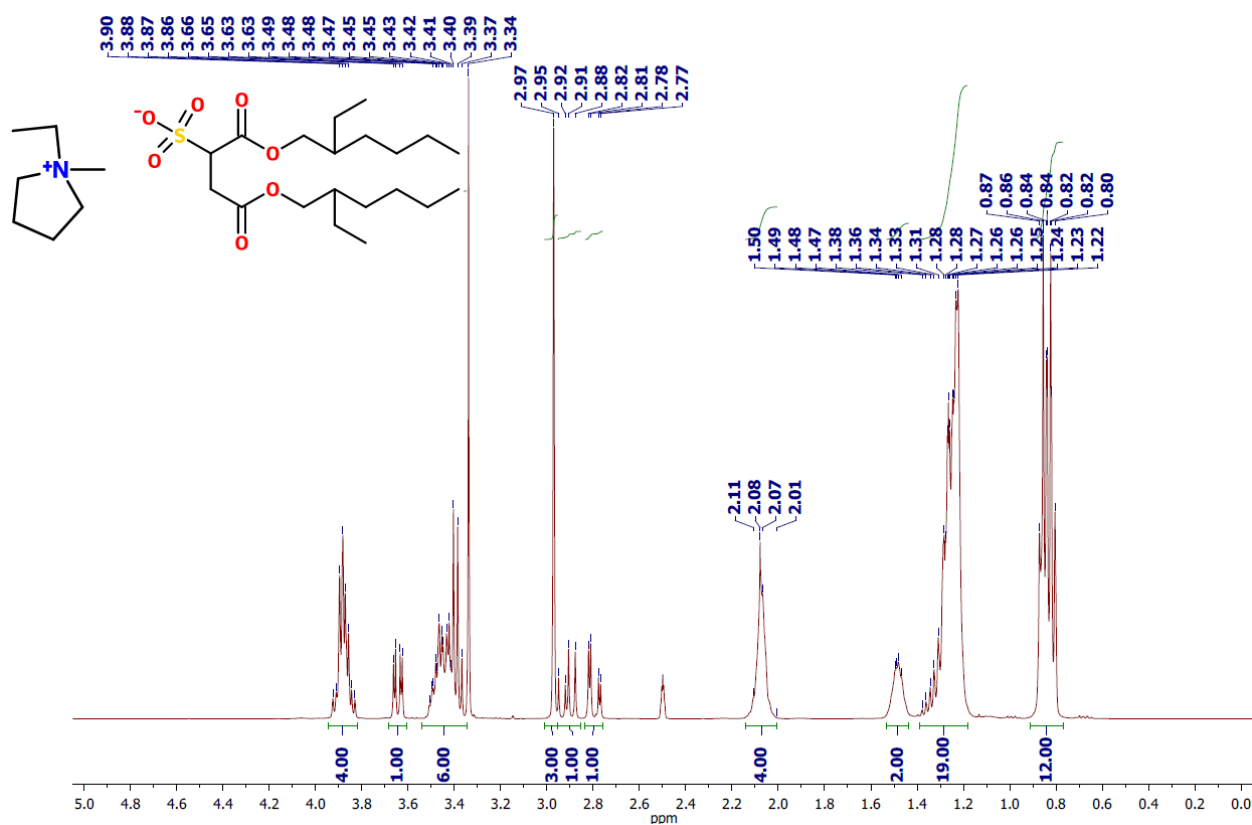

A

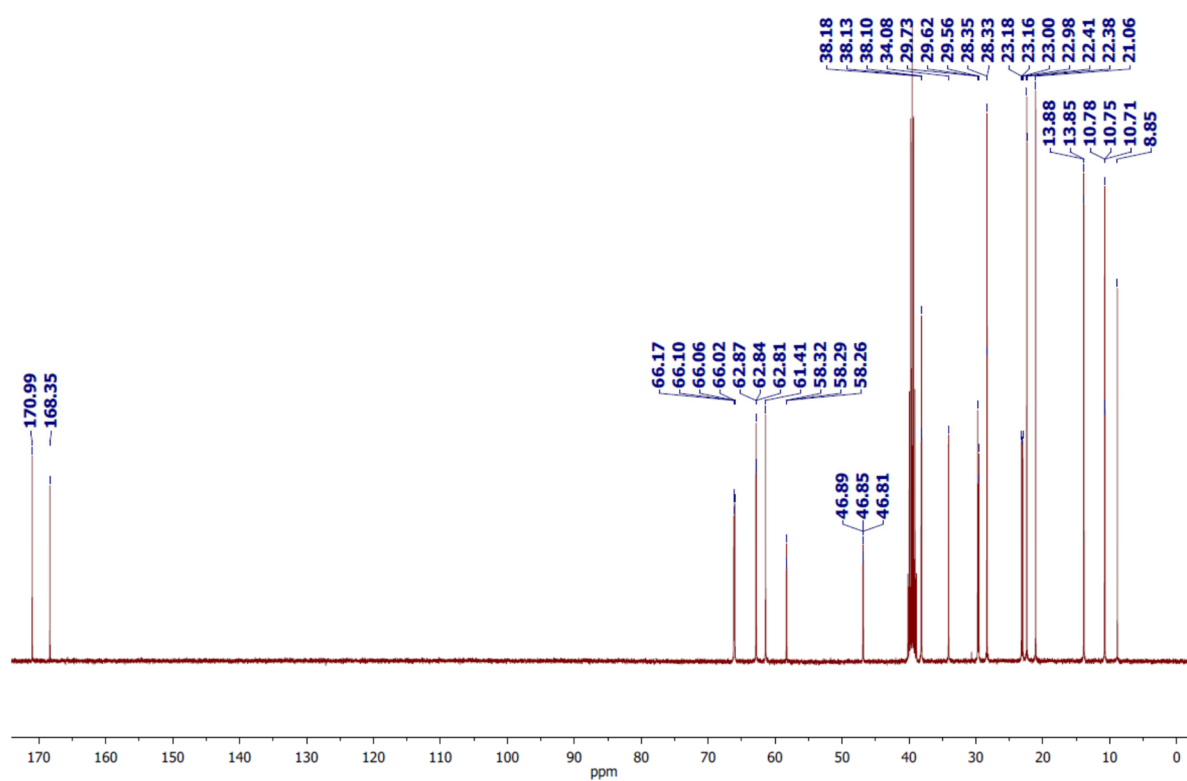

B

**Figure S2.** The  $^1\text{H}$  (a) and  $^{13}\text{C}$  NMR (b) of 1-ethyl-1-methylpyrrolidinium bis(2-ethylhexyl) sulfosuccinate.

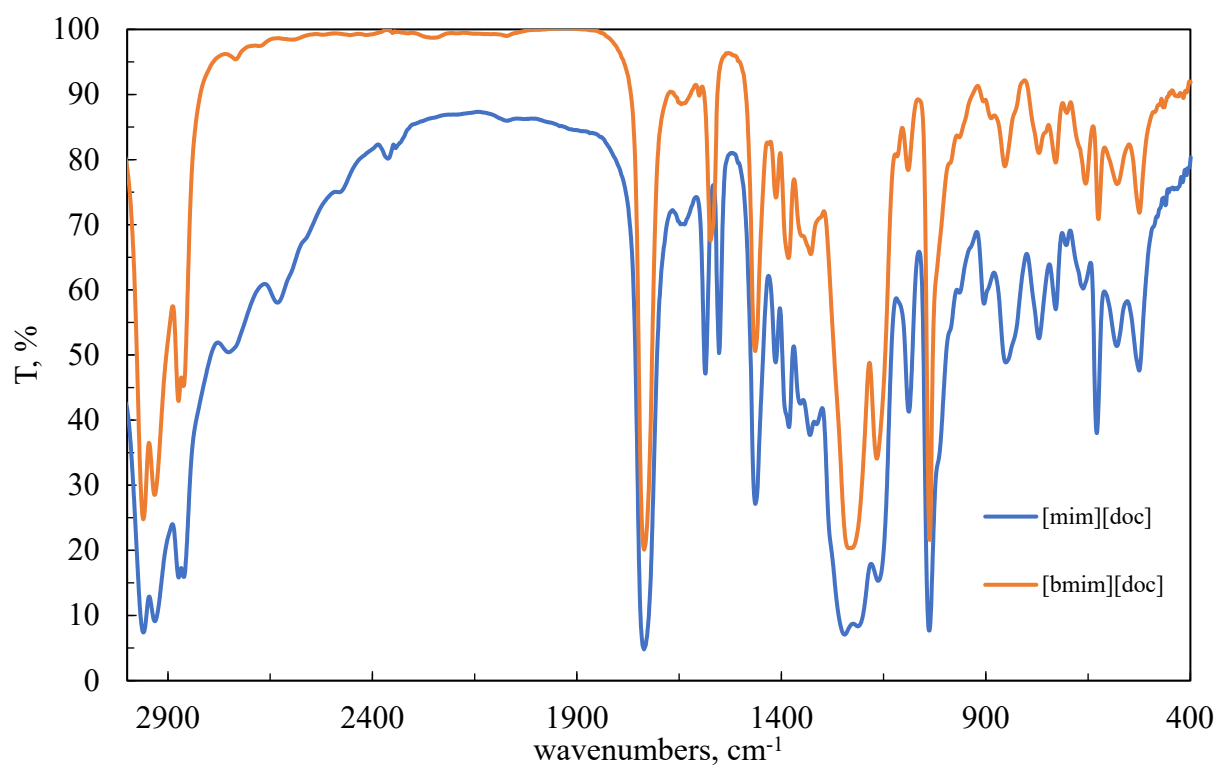

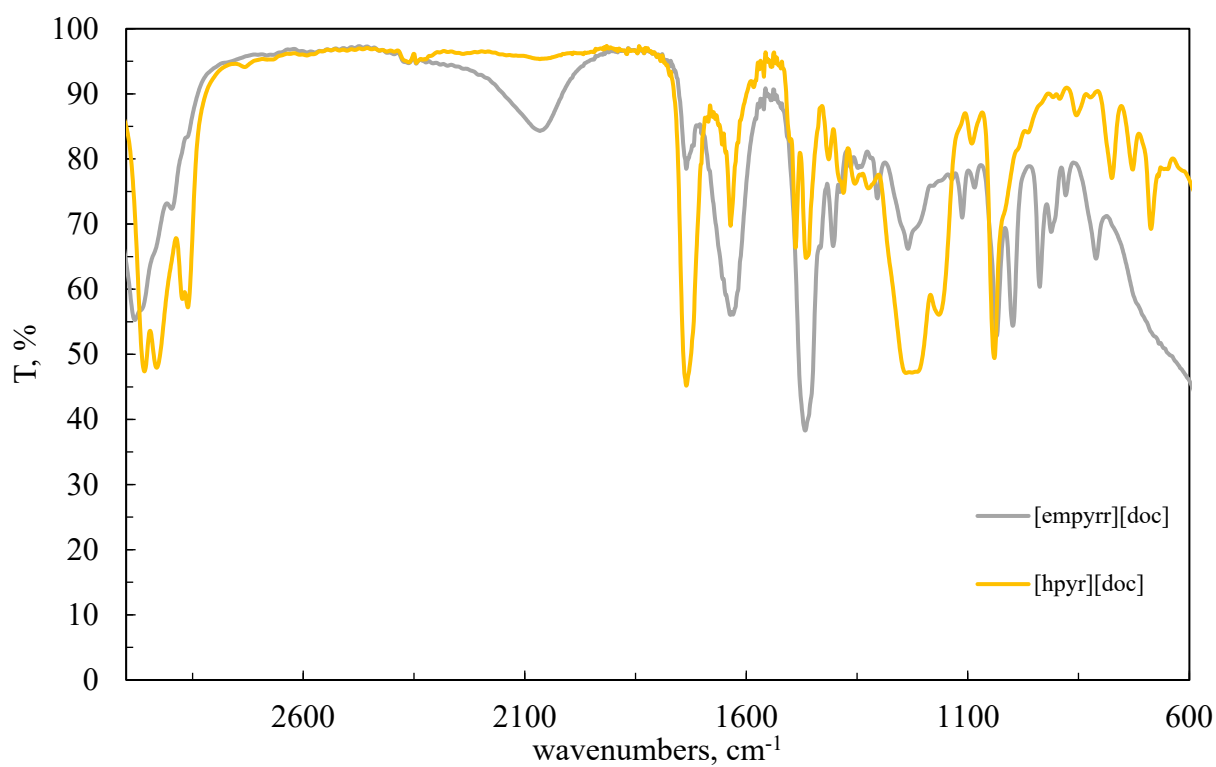

Figure S3. The FTIR spectra of the [doc] – based ILs.

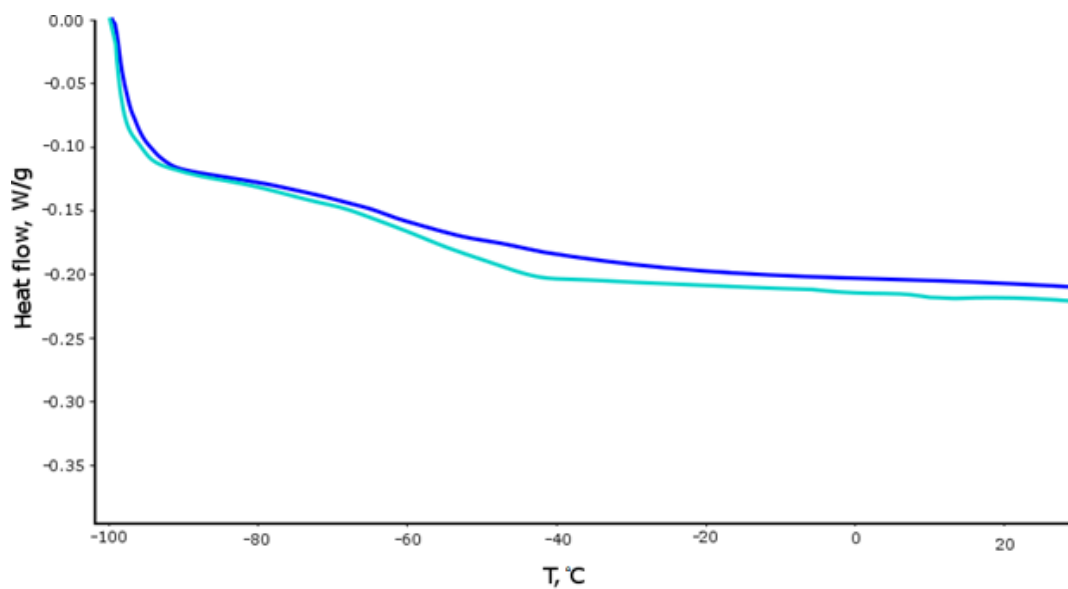

Figure S4. DSC thermograms of and 1-ethyl-1-methylpyrrolidinium bis(2-ethylhexyl) sulfosuccinate (a) 1- hexylpyridinium bis(2-ethylhexyl) sulfosuccinate (b).

**Table S1.** Mole Fraction Solubility of Carbon Dioxide Gas.

| T/K   | [bmim][doc] |                                 | [mim][doc]    |                                 |
|-------|-------------|---------------------------------|---------------|---------------------------------|
|       | P (bar)     | $m_{CO_2}/(mol_{CO_2}/kg_{IL})$ | P (bar)       | $m_{CO_2}/(mol_{CO_2}/kg_{IL})$ |
| 303.2 | 2.210       | 0.207                           | 2.073         | 0.067                           |
|       | 3.618       | 0.322                           | 3.477         | 0.111                           |
|       | 5.152       | 0.433                           | 4.878         | 0.153                           |
|       | 6.590       | 0.527                           | 6.275         | 0.193                           |
| 313.2 | 2.362       | 0.193                           | 2.312         | 0.071                           |
|       | 3.928       | 0.301                           | 3.654         | 0.110                           |
|       | 5.515       | 0.403                           | 5.130         | 0.152                           |
|       | 6.877       | 0.490                           | 6.411         | 0.187                           |
| 323.2 | 2.516       | 0.186                           | 2.652         | 0.077                           |
|       | 3.999       | 0.279                           | 3.995         | 0.114                           |
|       | 5.589       | 0.377                           | 5.487         | 0.155                           |
|       | 6.985       | 0.460                           | 6.813         | 0.189                           |
| 333.2 | 2.658       | 0.1818                          | 2.925         | 0.080                           |
|       | 4.351       | 0.2773                          | 4.283         | 0.115                           |
|       | 5.876       | 0.3626                          | 5.750         | 0.153                           |
|       | 7.279       | 0.438                           | 7.066         | 0.186                           |
|       | [hpyr][doc] |                                 | [empyrr][doc] |                                 |
|       | P (bar)     | $m_{CO_2}/(mol_{CO_2}/kg_{IL})$ | P (bar)       | $m_{CO_2}/(mol_{CO_2}/kg_{IL})$ |
| 303.2 | 2.191       | 0.095                           | 2.088         | 0.103                           |
|       | 3.577       | 0.140                           | 3.505         | 0.154                           |
|       | 4.662       | 0.169                           | 5.016         | 0.197                           |
|       | 6.286       | 0.205                           | 6.187         | 0.224                           |
| 313.2 | 2.213       | 0.088                           | 2.225         | 0.096                           |
|       | 3.672       | 0.132                           | 3.671         | 0.142                           |
|       | 4.776       | 0.160                           | 5.184         | 0.183                           |
|       | 6.392       | 0.195                           | 6.383         | 0.210                           |
| 323.2 | 2.230       | 0.078                           | 2.239         | 0.084                           |
|       | 3.784       | 0.121                           | 3.687         | 0.128                           |
|       | 4.934       | 0.148                           | 5.258         | 0.168                           |
|       | 6.655       | 0.183                           | 6.410         | 0.194                           |
| 333.2 | 2.478       | 0.074                           | 2.375         | 0.078                           |
|       | 3.994       | 0.110                           | 3.797         | 0.117                           |
|       | 5.180       | 0.135                           | 5.419         | 0.156                           |
|       | 6.904       | 0.167                           | 6.588         | 0.181                           |

**Table S2.** Mole Fraction Solubility of Hydrogen Sulfide Gas.

| T/K   | [bmim][doc] |                                 | [mim][doc] |                                 |
|-------|-------------|---------------------------------|------------|---------------------------------|
|       | P (bar)     | $m_{CO_2}/(mol_{CO_2}/kg_{IL})$ | P (bar)    | $m_{CO_2}/(mol_{CO_2}/kg_{IL})$ |
| 303.2 | 2.010       | 0.722                           | 1.995      | 0.247                           |
|       | 3.183       | 1.187                           | 3.365      | 0.426                           |
|       | 4.277       | 1.657                           | 4.280      | 0.550                           |
|       | 6.110       | 2.457                           | 5.428      | 0.711                           |
| 313.2 | 2.122       | 0.626                           | 2.179      | 0.252                           |
|       | 3.343       | 1.038                           | 3.529      | 0.414                           |
|       | 4.439       | 1.394                           | 4.402      | 0.527                           |
|       | 6.301       | 2.055                           | 5.606      | 0.674                           |
| 323.2 | 2.355       | 0.591                           | 2.293      | 0.249                           |
|       | 3.620       | 0.940                           | 3.651      | 0.340                           |
|       | 4.690       | 1.252                           | 4.527      | 0.505                           |

|       |             |                                 |               |                                 |
|-------|-------------|---------------------------------|---------------|---------------------------------|
| 333.2 | [hpyr][doc] |                                 | [empyrr][doc] |                                 |
|       | P (bar)     | $m_{H_2S}/(mol_{H_2S}/kg_{IL})$ | P (bar)       | $m_{H_2S}/(mol_{H_2S}/kg_{IL})$ |
|       | 2.311       | 0.247                           | 2.209         | 0.303                           |
|       | 3.545       | 0.410                           | 3.451         | 0.512                           |
|       | 4.700       | 0.590                           | 4.507         | 0.718                           |
| 303.2 | 5.789       | 0.789                           | 6.848         | 1.312                           |
|       | 2.449       | 0.241                           | 2.291         | 0.267                           |
|       | 3.643       | 0.388                           | 3.520         | 0.443                           |
|       | 4.776       | 0.550                           | 4.645         | 0.631                           |
| 313.2 | 5.902       | 0.740                           | 6.990         | 1.143                           |
|       | 2.451       | 0.216                           | 2.420         | 0.269                           |
|       | 3.714       | 0.355                           | 3.621         | 0.436                           |
|       | 4.953       | 0.517                           | 4.779         | 0.626                           |
| 323.2 | 6.201       | 0.713                           | 7.216         | 1.166                           |
|       | 2.580       | 0.201                           | 2.491         | 0.250                           |
|       | 3.785       | 0.317                           | 3.763         | 0.412                           |
|       | 5.008       | 0.455                           | 4.962         | 0.595                           |
| 333.2 | 6.315       | 0.630                           | 7.279         | 1.075                           |

**Table S3.** Density and viscosity of the ILs as a function of temperature.

| T / K  | $\rho$ (g·cm <sup>-3</sup> ) |             | $\eta$ (mPa·s) |             |
|--------|------------------------------|-------------|----------------|-------------|
|        | [mim][doc]                   | [bmim][doc] | [mim][doc]     | [bmim][doc] |
| 293.15 | 1.0874                       | 1.0875      | 3381.1         | 3441.7      |
| 303.15 | 1.0801                       | 1.0802      | 1439.9         | 1454        |
| 313.15 | 1.0728                       | 1.0729      | 683.91         | 692.32      |
| 323.15 | 1.0654                       | 1.0655      | 359.48         | 363.28      |
| 333.15 | 1.0584                       | 1.0583      | 204.86         | 206.52      |
| T / K  | $\rho$ (g·cm <sup>-3</sup> ) |             | $\eta$ (mPa·s) |             |
|        | [empyrr][doc]                | [hpyr][doc] | [empyrr][doc]  | [hpyr][doc] |
| 303.15 | -                            | 1.0859      | -              | 4342.2      |
| 313.15 | 1.0879                       | 1.0788      | 2670           | 1895.2      |
| 323.15 | 1.0795                       | 1.0717      | 1242.3         | 893.16      |
| 333.15 | 1.07227                      | 1.0647      | 628.36         | 468.13      |
| 343.15 | 1.0652                       | 1.0578      | 346.75         | 267.58      |
| 353.15 | 1.05826                      | -           | 207.47         | -           |
